# Supplementary figures and images for: Targeting and Sensitization of Breast Cancer Cells to Killing with a Novel Interleukin-13 Receptor α2-Specific Hybrid Cytolytic Peptide
Source: MDPI journal article supplement (doi:10.3390/cancers15102772), 2023-05-16

Figure 2b

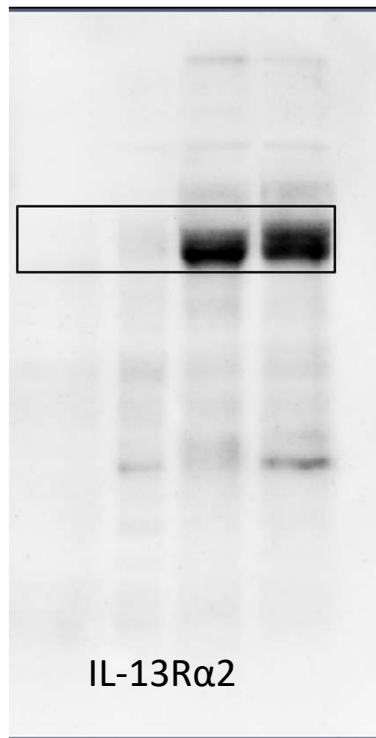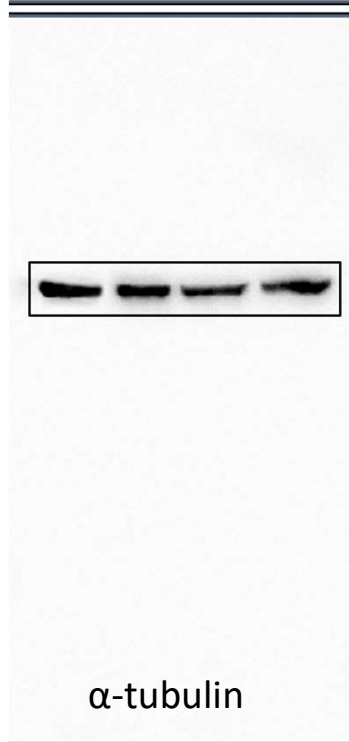

Figure 3a

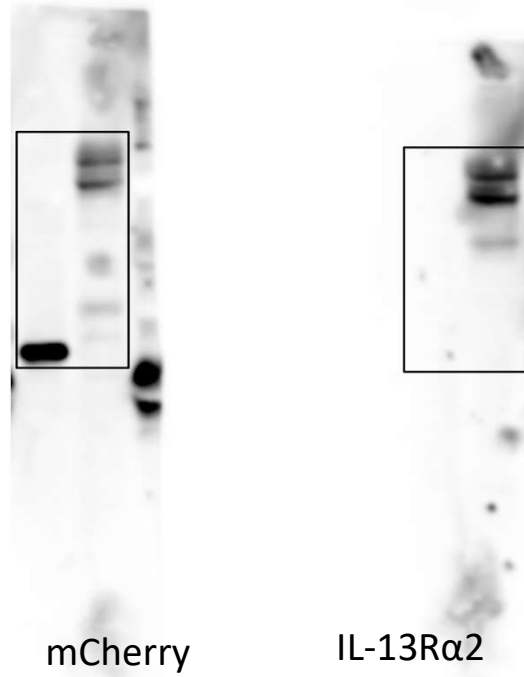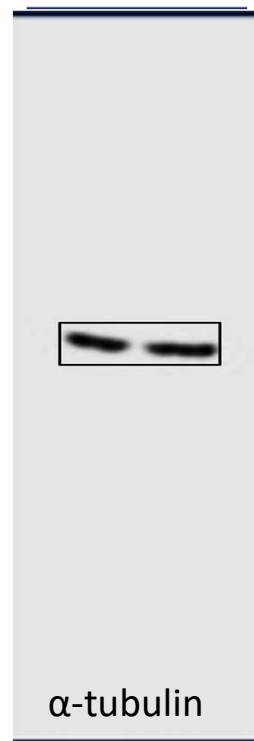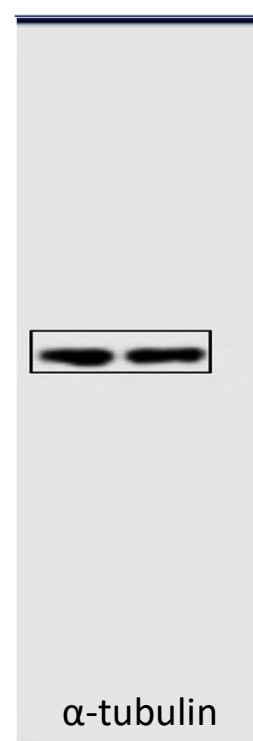

Supplement: s1 [file s1]
